# Supplementary material
Source: MDPI journal article supplement (https://www.mdpi.com/1099-4300/23/11/1492)
Supplement: s1 [file s1]

| Line # | Question/Percentile of household                    | 0            | 10           | 20           | 30          | 40          | 50          |
|--------|-----------------------------------------------------|--------------|--------------|--------------|-------------|-------------|-------------|
| 1      | Government support                                  | \$30,871     | \$22,383     | \$14,540     | \$6,228     | \$0         | \$0         |
| 2      | Earnings income                                     | \$0          | \$8,488      | \$16,326     | \$24,603    | \$33,705    | \$44,064    |
| 3      | Other income <i>(from worksheet)</i>                | \$0          | \$0          | \$5          | \$40        | \$173       | \$558       |
| 4      | Total deductible income <i>(add lines 2 and 3)</i>  | \$0          | \$8,488      | \$16,331     | \$24,643    | \$33,878    | \$44,622    |
| 5      | Basic deduction <i>(from table)</i>                 | \$30,871     | \$30,871     | \$30,871     | \$30,871    | \$30,871    | \$30,871    |
| 6      | Itemized deductions <i>(from worksheet)</i>         | \$0          | \$0          | \$0          | \$0         | \$241       | \$1,719     |
| 7      | Total deductions <i>(add lines 5 and 6)</i>         | \$30,871     | \$30,871     | \$30,871     | \$30,871    | \$31,112    | \$32,590    |
| 8      | Reduced income <i>(subtract line 7 from line 4)</i> | (\$30,871)   | (\$22,383)   | (\$14,540)   | (\$6,228)   | \$2,766     | \$12,032    |
| 9      | Adjusted income <i>(the greater of line 8 or 0)</i> | \$0          | \$0          | \$0          | \$0         | \$2,766     | \$12,032    |
| 10     | Taxable income <i>(add lines 1 and 9)</i>           | \$30,871     | \$22,383     | \$14,540     | \$6,228     | \$2,766     | \$12,032    |
| 11     | Tax owned <i>(multiply line 10 by 0.277443)</i>     | \$8,565      | \$6,210      | \$4,034      | \$1,728     | \$768       | \$3,338     |
|        | <b>effective tax rate</b>                           | <b>27.7%</b> | <b>20.1%</b> | <b>13.1%</b> | <b>5.6%</b> | <b>2.3%</b> | <b>7.5%</b> |

| Line # | Question/Percentile of household                    | 60           | 70           | 80           | 90           | 95           | 99           |
|--------|-----------------------------------------------------|--------------|--------------|--------------|--------------|--------------|--------------|
| 1      | Government support                                  | \$0          | \$0          | \$0          | \$0          | \$0          | \$0          |
| 2      | Earnings income                                     | \$56,289     | \$71,677     | \$93,501     | \$135,429    | \$189,913    | \$411,893    |
| 3      | Other income <i>(from worksheet)</i>                | \$1,498      | \$3,616      | \$8,343      | \$20,455     | \$36,958     | \$97,951     |
| 4      | Total deductible income <i>(add lines 2 and 3)</i>  | \$57,787     | \$75,293     | \$101,844    | \$155,884    | \$226,871    | \$509,844    |
| 5      | Basic deduction <i>(from table)</i>                 | \$30,871     | \$30,871     | \$30,871     | \$30,871     | \$30,871     | \$30,871     |
| 6      | Itemized deductions <i>(from worksheet)</i>         | \$4,845      | \$10,883     | \$13,741     | \$13,741     | \$13,741     | \$13,741     |
| 7      | Total deductions <i>(add lines 5 and 6)</i>         | \$35,716     | \$41,754     | \$44,612     | \$44,612     | \$44,612     | \$44,612     |
| 8      | Reduced income <i>(subtract line 7 from line 4)</i> | \$22,071     | \$33,539     | \$57,232     | \$111,272    | \$182,259    | \$465,232    |
| 9      | Adjusted income <i>(the greater of line 8 or 0)</i> | \$22,071     | \$33,539     | \$57,232     | \$111,272    | \$182,259    | \$465,232    |
| 10     | Taxable income <i>(add lines 1 and 9)</i>           | \$22,071     | \$33,539     | \$57,232     | \$111,272    | \$182,259    | \$465,232    |
| 11     | Tax owned <i>(multiply line 10 by 0.277443)</i>     | \$6,123      | \$9,305      | \$15,879     | \$30,872     | \$50,566     | \$129,075    |
|        | <b>effective tax rate</b>                           | <b>10.6%</b> | <b>12.4%</b> | <b>15.6%</b> | <b>19.8%</b> | <b>22.3%</b> | <b>25.3%</b> |
