# Supplementary material
Source: MDPI journal article supplement (https://www.mdpi.com/1099-4300/23/11/1492)
Supplement: s1 [file s1]

**Table 539. Government Transfer Payments to Individuals—Summary: 1990 to 2009**

[In billions of dollars (566.1 represents \$566,100,000,000)]

| Year      | Transfer payments, total | Retirement and disability insurance benefits | Medical payments | Income maintenance benefits | Unemployment insurance benefits | Veterans benefits | Federal education and training assistance payments <sup>1</sup> | Other <sup>2</sup> |
|-----------|--------------------------|----------------------------------------------|------------------|-----------------------------|---------------------------------|-------------------|-----------------------------------------------------------------|--------------------|
| 1990..... | 566.1                    | 263.9                                        | 188.8            | 63.5                        | 18.2                            | 17.7              | 12.3                                                            | 1.7                |
| 1995..... | 849.8                    | 350.0                                        | 338.6            | 100.4                       | 21.8                            | 20.5              | 17.2                                                            | 1.2                |
| 1998..... | 940.9                    | 391.2                                        | 383.4            | 101.1                       | 19.9                            | 23.3              | 20.5                                                            | 1.6                |
| 1999..... | 975.7                    | 402.4                                        | 400.7            | 104.8                       | 20.7                            | 24.1              | 21.3                                                            | 1.7                |
| 2000..... | 1,027.8                  | 424.5                                        | 427.2            | 106.3                       | 21.0                            | 25.0              | 21.9                                                            | 2.0                |
| 2001..... | 1,126.7                  | 449.8                                        | 480.8            | 109.4                       | 32.1                            | 26.6              | 25.4                                                            | 2.6                |
| 2002..... | 1,232.1                  | 474.4                                        | 523.8            | 120.7                       | 53.7                            | 29.5              | 27.9                                                            | 2.1                |
| 2003..... | 1,299.0                  | 493.5                                        | 555.8            | 133.2                       | 53.6                            | 31.8              | 28.5                                                            | 2.7                |
| 2004..... | 1,381.2                  | 517.1                                        | 610.3            | 144.2                       | 37.1                            | 34.0              | 31.2                                                            | 7.3                |
| 2005..... | 1,465.1                  | 545.4                                        | 653.2            | 159.6                       | 32.3                            | 36.4              | 33.8                                                            | 4.5                |
| 2006..... | 1,565.6                  | 576.9                                        | 717.0            | 163.4                       | 30.9                            | 38.9              | 35.9                                                            | 2.7                |
| 2007..... | 1,669.8                  | 609.1                                        | 771.4            | 172.3                       | 33.4                            | 41.7              | 39.5                                                            | 2.6                |
| 2008..... | 1,824.1                  | 639.6                                        | 822.1            | 185.8                       | 52.0                            | 45.1              | 45.6                                                            | 33.8               |
| 2009..... | 2,076.1                  | 699.5                                        | 892.4            | 217.9                       | 130.1                           | 51.4              | 56.7                                                            | 28.0               |

<sup>1</sup> See footnote 9, Table 540. <sup>2</sup> See footnote 10, Table 540.

Source: U.S. Bureau of Economic Analysis, "Regional Accounts Data, Annual State Personal Income," <<http://www.bea.gov/regional/spi/>>, accessed March 2011.

**Table 540. Government Transfer Payments to Individuals by Type: 1990 to 2009**

[In millions of dollars (566,100 represents \$566,100,000,000)]

| Item                                                                  | 1990           | 2000             | 2005             | 2006             | 2007             | 2008             | 2009             |
|-----------------------------------------------------------------------|----------------|------------------|------------------|------------------|------------------|------------------|------------------|
| <b>Total.....</b>                                                     | <b>566,100</b> | <b>1,027,827</b> | <b>1,465,125</b> | <b>1,565,646</b> | <b>1,669,795</b> | <b>1,824,122</b> | <b>2,076,109</b> |
| Retirement & disability insurance benefit payments.....               | 263,888        | 424,461          | 545,361          | 576,904          | 609,100          | 639,619          | 699,519          |
| Old-age, survivors, & disability insurance.....                       | 244,135        | 401,393          | 512,728          | 544,096          | 575,648          | 605,530          | 664,287          |
| Railroad retirement and disability.....                               | 7,221          | 8,267            | 9,191            | 9,519            | 9,813            | 10,068           | 10,630           |
| Workers' compensation payments (federal & state).....                 | 8,618          | 10,898           | 15,866           | 15,650           | 15,794           | 16,120           | 16,434           |
| Other government disability insurance & retirement <sup>1</sup> ..... | 3,914          | 3,903            | 7,576            | 7,639            | 7,845            | 7,901            | 8,168            |
| Medical payments.....                                                 | 188,808        | 427,194          | 653,193          | 717,010          | 771,361          | 822,111          | 892,410          |
| Medicare.....                                                         | 107,638        | 219,117          | 331,924          | 399,193          | 427,556          | 462,773          | 500,254          |
| Public assistance medical care <sup>2</sup> .....                     | 78,176         | 205,021          | 315,032          | 310,977          | 336,884          | 351,846          | 383,614          |
| Military medical insurance <sup>3</sup> .....                         | 2,994          | 3,056            | 6,237            | 6,840            | 6,921            | 7,492            | 8,542            |
| Income maintenance benefit payments.....                              | 63,481         | 106,285          | 159,624          | 163,418          | 172,255          | 185,846          | 217,858          |
| Supplemental Security Income (SSI).....                               | 16,670         | 31,675           | 38,285           | 39,892           | 42,285           | 44,150           | 47,534           |
| Family assistance <sup>4</sup> .....                                  | 19,187         | 18,440           | 18,216           | 18,226           | 18,334           | 19,255           | 20,088           |
| Food stamps.....                                                      | 14,741         | 14,565           | 29,492           | 29,390           | 30,920           | 36,987           | 54,574           |
| Other income maintenance <sup>5</sup> .....                           | 12,883         | 41,605           | 73,631           | 75,910           | 80,716           | 85,454           | 95,662           |
| Unemployment insurance benefit payments.....                          | 18,208         | 20,989           | 32,276           | 30,900           | 33,381           | 52,022           | 130,141          |
| State unemployment insurance compensation.....                        | 17,644         | 20,223           | 31,001           | 29,594           | 32,006           | 50,318           | 127,915          |
| Unemployment compensation for federal civilian employees.....         | 215            | 226              | 224              | 218              | 216              | 255              | 439              |
| Unemployment compensation for railroad employees.....                 | 89             | 81               | 72               | 78               | 83               | 84               | 179              |
| Unemployment compensation for veterans.....                           | 144            | 181              | 446              | 449              | 406              | 467              | 840              |
| Other unemployment compensation <sup>6</sup> .....                    | 116            | 278              | 533              | 561              | 670              | 898              | 768              |
| Veterans benefit payments.....                                        | 17,687         | 25,004           | 36,371           | 38,877           | 41,676           | 45,125           | 51,429           |
| Veterans pension and disability.....                                  | 15,550         | 21,966           | 32,505           | 35,018           | 37,721           | 40,798           | 45,391           |
| Veterans readjustment <sup>7</sup> .....                              | 257            | 1,322            | 2,256            | 2,290            | 2,421            | 2,783            | 4,518            |
| Veterans life insurance benefits.....                                 | 1,868          | 1,706            | 1,596            | 1,554            | 1,517            | 1,523            | 1,493            |
| Other assistance to veterans <sup>8</sup> .....                       | 12             | 10               | 14               | 15               | 17               | 21               | 27               |
| Federal education & training assistance payments <sup>9</sup> .....   | 12,286         | 21,851           | 33,796           | 35,859           | 39,450           | 45,577           | 56,747           |
| Other payments to individuals <sup>10</sup> .....                     | 1,742          | 2,043            | 4,504            | 2,678            | 2,572            | 33,822           | 28,005           |

<sup>1</sup> Consists largely of temporary disability payments, pension benefit guaranty payments, and black lung payments. <sup>2</sup> Consists of medicaid and other medical vendor payments. <sup>3</sup> Consists of payments made under the TriCare Management Program (formerly called CHAMPUS) for the medical care of dependents of active duty military personnel and of retired military personnel and their dependents at nonmilitary medical facilities. <sup>4</sup> Through 1990, consists of emergency assistance and aid to families with dependent children. Beginning with 2000, consists of benefits—generally known as temporary assistance for needy families—provided under the Personal Responsibility and Work Opportunity Reconciliation Act of 1996. <sup>5</sup> Consists largely of general assistance, expenditures for food under the supplemental program for women, infants, and children; refugee assistance; foster home care and adoption assistance; earned income tax credits; and energy assistance. <sup>6</sup> Consists of trade readjustment allowance payments, Redwood Park benefit payments, public service employment benefit payments, and transitional benefit payments. <sup>7</sup> Consists largely of veterans' readjustment benefit payments, educational assistance to spouses and children of disabled or deceased veterans, payments to paraplegics, and payments for autos and conveyances for disabled veterans. <sup>8</sup> Consists largely of state and local government payments to veterans. <sup>9</sup> Excludes veterans. Consists largely of federal fellowship payments (National Science Foundation fellowships and traineeships, subsistence payments to state maritime academy cadets, and other federal fellowships), interest subsidy on higher education loans, basic educational opportunity grants, and Job Corps payments. <sup>10</sup> Consists largely of Bureau of Indian Affairs payments, education exchange payments, Alaska Permanent Fund dividend payments, compensation of survivors of public safety officers, compensation of victims of crime, disaster relief payments, compensation for Japanese internment, and other special payments to individuals.

Source: U.S. Bureau of Economic Analysis, "Regional Accounts Data, Annual State Personal Income," <<http://www.bea.gov/regional/spi/>>, accessed March 2011.
