# Supplementary material
Source: MDPI journal article supplement (https://www.mdpi.com/1099-4300/23/11/1492)
Supplement: s1 [file s1]

| Line # | Question/Percentile of household                    | 0          | 10         | 20         | 30        | 40       | 50       |
|--------|-----------------------------------------------------|------------|------------|------------|-----------|----------|----------|
| 1      | Government support                                  | \$30,871   | \$22,383   | \$14,540   | \$6,228   | \$0      | \$0      |
| 2      | Earnings income                                     | \$0        | \$8,488    | \$16,326   | \$24,603  | \$33,705 | \$44,064 |
| 3      | Other income <i>(from worksheet)</i>                | \$0        | \$0        | \$5        | \$40      | \$173    | \$558    |
| 4      | Total deductible income <i>(add lines 2 and 3)</i>  | \$0        | \$8,488    | \$16,331   | \$24,643  | \$33,878 | \$44,622 |
| 5      | Basic deduction <i>(from table)</i>                 | \$30,871   | \$30,871   | \$30,871   | \$30,871  | \$30,871 | \$30,871 |
| 6      | Itemized deductions <i>(from worksheet)</i>         | \$0        | \$0        | \$0        | \$0       | \$241    | \$1,719  |
| 7      | Total deductions <i>(add lines 5 and 6)</i>         | \$30,871   | \$30,871   | \$30,871   | \$30,871  | \$31,112 | \$32,590 |
| 8      | Reduced income <i>(subtract line 7 from line 4)</i> | (\$30,871) | (\$22,383) | (\$14,540) | (\$6,228) | \$2,766  | \$12,032 |
| 9      | Adjusted income <i>(the greater of line 8 or 0)</i> | \$0        | \$0        | \$0        | \$0       | \$2,766  | \$12,032 |
| 10     | Taxable income <i>(add lines 1 and 9)</i>           | \$30,871   | \$22,383   | \$14,540   | \$6,228   | \$2,766  | \$12,032 |
| 11     | Tax owned <i>(multiply line 10 by 0.277443)</i>     | \$8,565    | \$6,210    | \$4,034    | \$1,728   | \$768    | \$3,338  |
|        | effective tax rate                                  | 27.7%      | 20.1%      | 13.1%      | 5.6%      | 2.3%     | 7.5%     |

| Line # | Question/Percentile of household                    | 60       | 70       | 80        | 90        | 95        | 99        |
|--------|-----------------------------------------------------|----------|----------|-----------|-----------|-----------|-----------|
| 1      | Government support                                  | \$0      | \$0      | \$0       | \$0       | \$0       | \$0       |
| 2      | Earnings income                                     | \$56,289 | \$71,677 | \$93,501  | \$135,429 | \$189,913 | \$411,893 |
| 3      | Other income <i>(from worksheet)</i>                | \$1,498  | \$3,616  | \$8,343   | \$20,455  | \$36,958  | \$97,951  |
| 4      | Total deductible income <i>(add lines 2 and 3)</i>  | \$57,787 | \$75,293 | \$101,844 | \$155,884 | \$226,871 | \$509,844 |
| 5      | Basic deduction <i>(from table)</i>                 | \$30,871 | \$30,871 | \$30,871  | \$30,871  | \$30,871  | \$30,871  |
| 6      | Itemized deductions <i>(from worksheet)</i>         | \$4,845  | \$10,883 | \$13,741  | \$13,741  | \$13,741  | \$13,741  |
| 7      | Total deductions <i>(add lines 5 and 6)</i>         | \$35,716 | \$41,754 | \$44,612  | \$44,612  | \$44,612  | \$44,612  |
| 8      | Reduced income <i>(subtract line 7 from line 4)</i> | \$22,071 | \$33,539 | \$57,232  | \$111,272 | \$182,259 | \$465,232 |
| 9      | Adjusted income <i>(the greater of line 8 or 0)</i> | \$22,071 | \$33,539 | \$57,232  | \$111,272 | \$182,259 | \$465,232 |
| 10     | Taxable income <i>(add lines 1 and 9)</i>           | \$22,071 | \$33,539 | \$57,232  | \$111,272 | \$182,259 | \$465,232 |
| 11     | Tax owned <i>(multiply line 10 by 0.277443)</i>     | \$6,123  | \$9,305  | \$15,879  | \$30,872  | \$50,566  | \$129,075 |
|        | effective tax rate                                  | 10.6%    | 12.4%    | 15.6%     | 19.8%     | 22.3%     | 25.3%     |
